# Supplementary material for: A new generation of platinum and iodine free efficient dye-sensitized solar cells
Source: Royal Society of Chemistry journal article supplement (doi:10.1039/c2cp41611e), 2012-01-01

## Supporting Information for:

### A new generation of Platinum and Iodine free efficient Dye-sensitized solar cells

Shahzada Ahmad,<sup>a,b\*</sup> Takeru Bessho<sup>a</sup>, Florian Kessler<sup>a</sup>, Etienne Baranoff<sup>a</sup>, Julien Frey<sup>a</sup>, Chenyi Yi<sup>a</sup>, Michael Grätzel<sup>a</sup> and Mohammad K. Nazeeruddin<sup>a\*</sup>

<sup>a</sup>Laboratory of Photonics and Interfaces, Department de Chimie, Ecole Polytechnique Federale de Lausanne, CH-1015 Lausanne, Switzerland

<sup>b</sup>Max Planck Institute for Polymer Research, Ackermannweg 10  
D-55138 Mainz, Germany

**Complex 1a:**  $E_{\text{ox}} = 0.32\text{V}$  (quasi reversible) –  $E_{\text{red}} = -1.45\text{V}$  (quasi reversible)

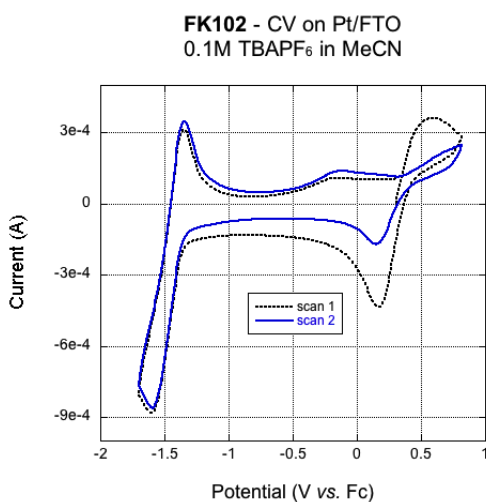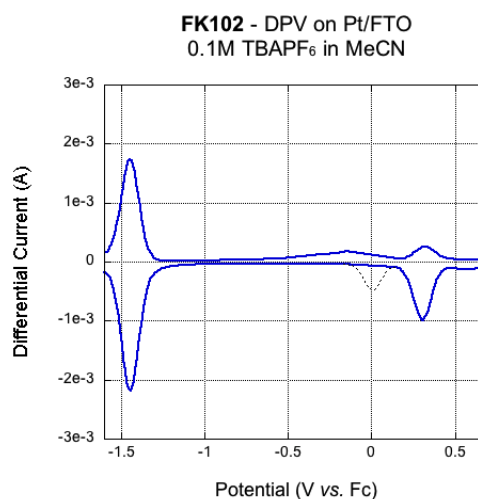

**2a:**  $E_{\text{ox}} = 0.34\text{V}$  (quasi reversible) –  $E_{\text{red}} = -1.55\text{V}$  (irreversible)

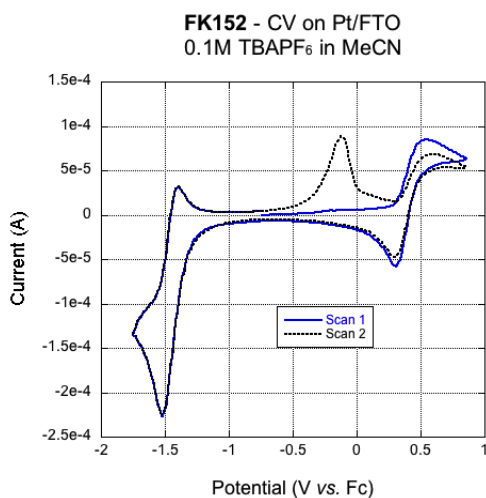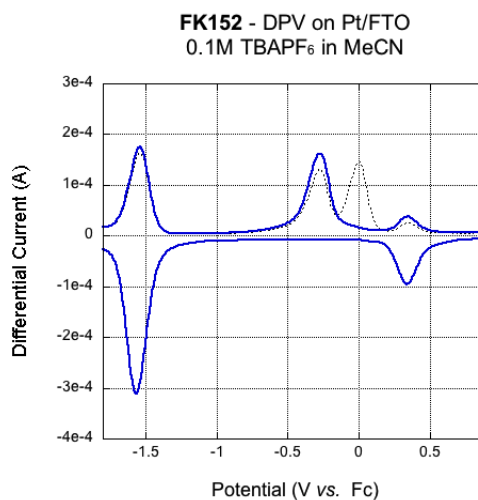

**Complex 3a:**  $E_{\text{ox}} = 0.17\text{V}$  (quasi reversible) –  $E_{\text{red}} = -1.15\text{V}$  (quasi reversible)

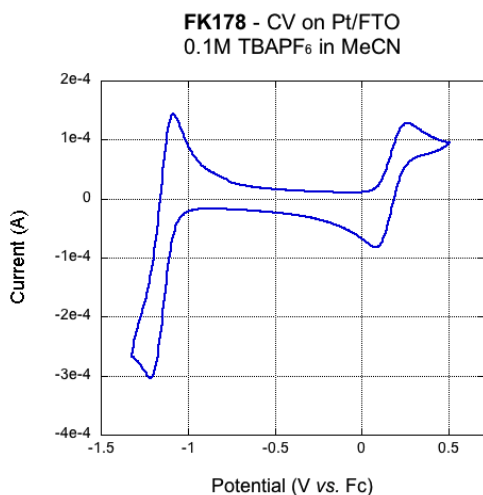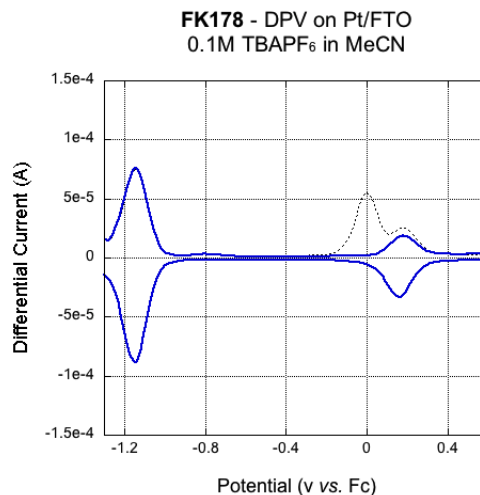

**Complex 4a:**  $E_{\text{ox}} = 0.22\text{V}$  (quasi reversible) –  $E_{\text{red}} = -1.20\text{V}$  (quasi reversible)

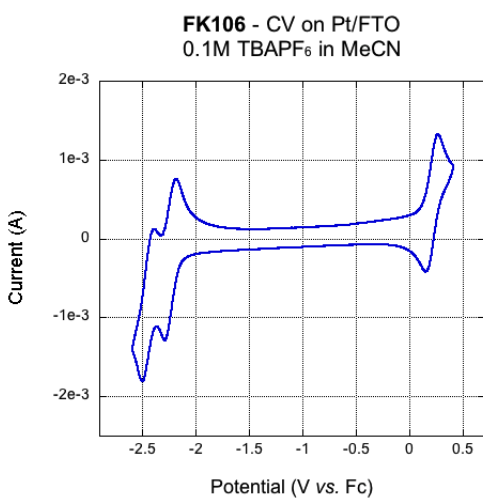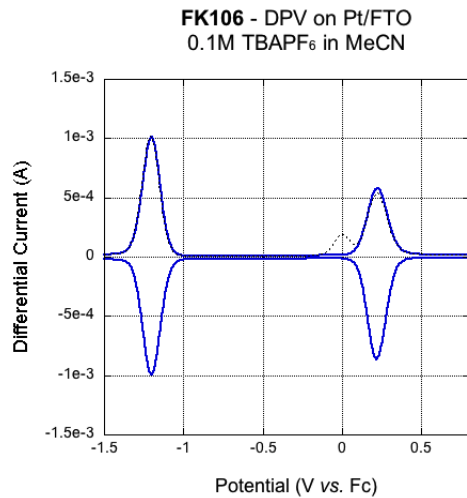

**Complex 5a:**  $E_{\text{ox}} = 0.23\text{V}$  (quasi reversible) –  $E_{\text{red}} = -1.20\text{V}$  (quasi reversible)

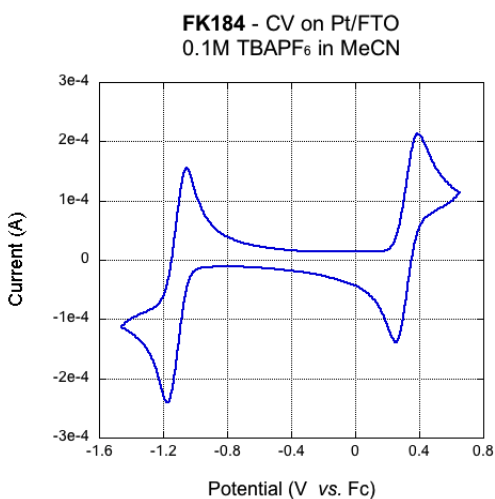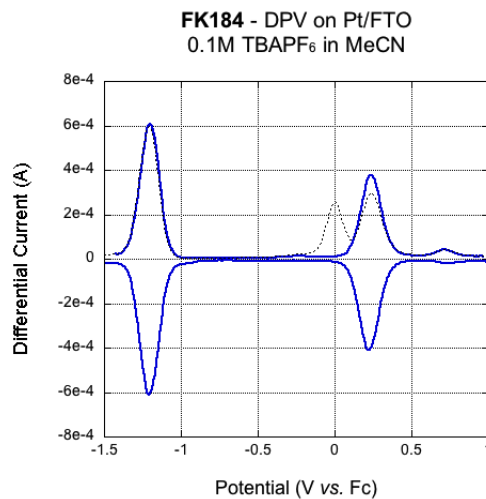

**Complex 6a:**  $E_{\text{ox}} = 0.24\text{V}$  (quasireversible) –  $E_{\text{red}} = -1.20\text{V}$  (quasireversible)

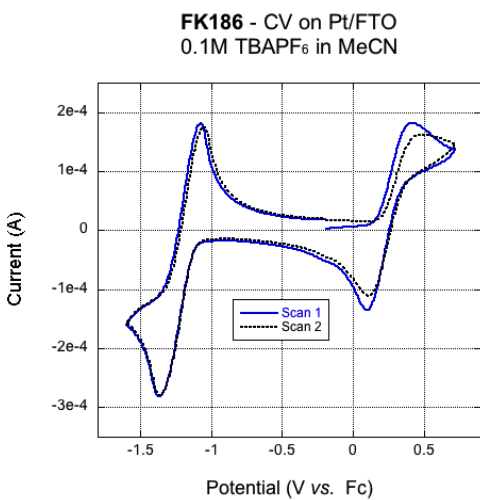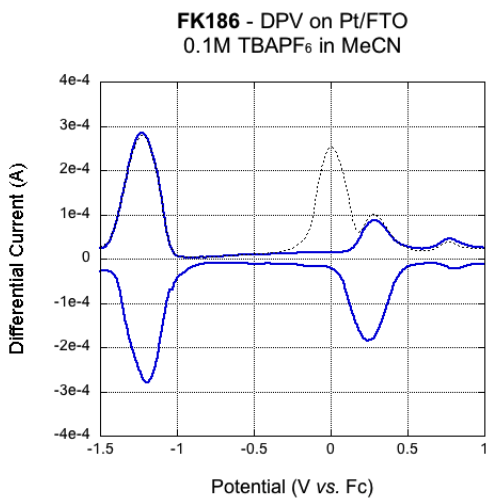

Supplement: c2cp41611e.pdf [file c2cp41611e.pdf]
